# Supplementary material for: Tumor PD-L1 status and CD8+ tumor-infiltrating T cells: markers of improved prognosis in oropharyngeal cancer
Source: PubMed Central journal article supplement (PMC5655210; doi:10.18632/oncotarget.19045), 2017-07-06
Supplement: oncotarget-08-80443-s001.pdf [file oncotarget-08-80443-s001.pdf]

## Tumor PD-L1 status and CD8<sup>+</sup> tumor-infiltrating T cells: markers of improved prognosis in oropharyngeal cancer

### Supplementary Materials

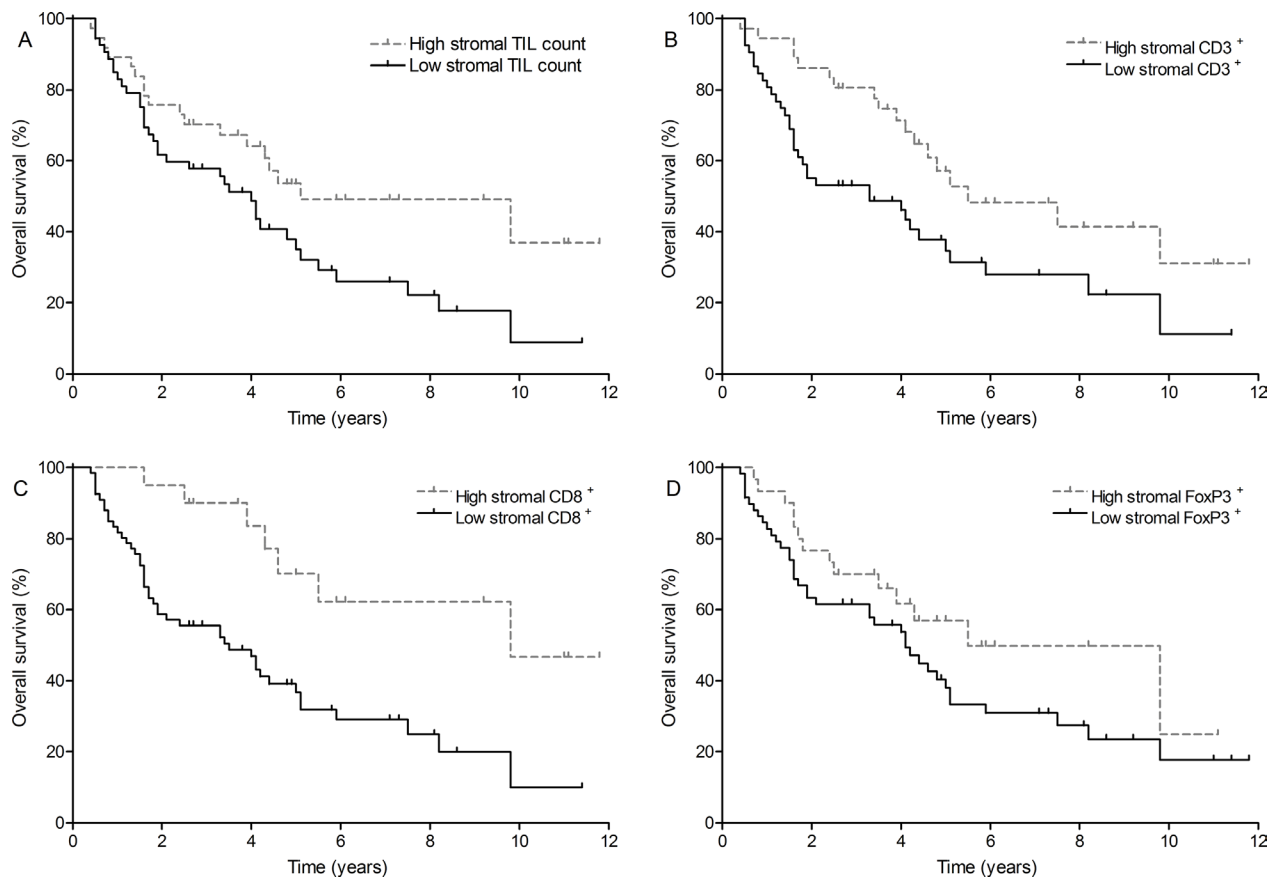

**Supplementary Figure 1: Overall survival outcome of stromal immune cell infiltrate.** (A) TIL count (0.55 [0.33–0.96],  $P = 0.0335$ ); (B) CD3<sup>+</sup> T cell count (0.50 [0.29–0.87],  $P = 0.0139$ ); (C) CD8<sup>+</sup> T cell count (0.32 [0.22–0.71],  $P = 0.0020$ ) and (D) FoxP3<sup>+</sup> T cell count (0.63 [0.37–1.14],  $P = 0.1292$ ). Cut-off values (low versus high) were taken at median values: 3<sup>+</sup> (TIL count, CD3<sup>+</sup> T cell count and CD8<sup>+</sup> T cell count) and 2<sup>+</sup> (FoxP3<sup>+</sup> T cell count). TIL, tumor-infiltrating lymphocyte.

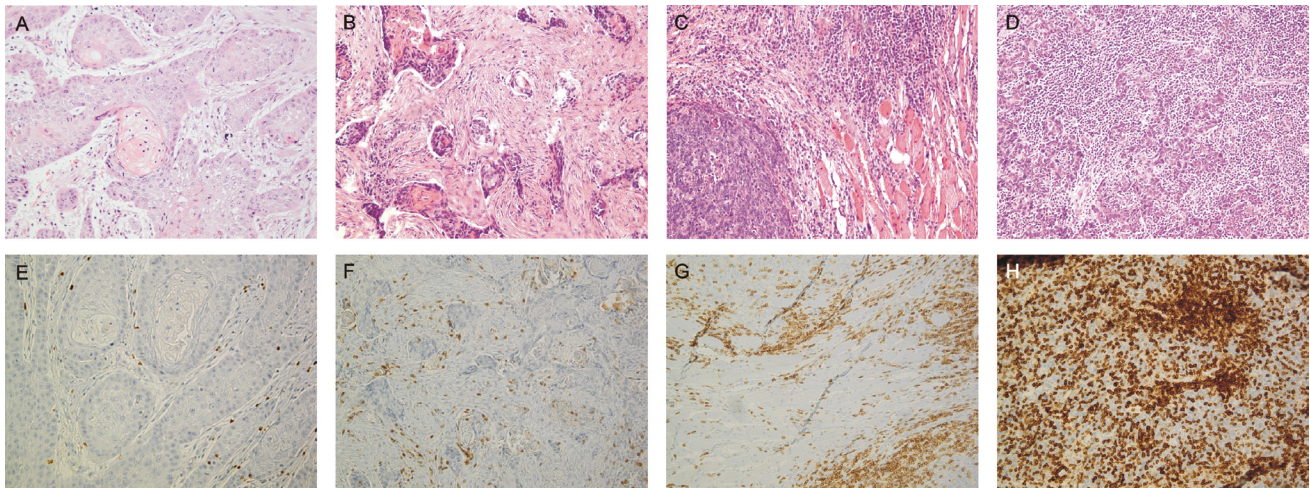

**Supplementary Figure 2: Representative hematoxylin-eosin staining for presence of tumor infiltrating lymphocytes and CD3<sup>+</sup> T cell count (x200).** TIL count was scored semi-quantitatively as follows: (A) 1<sup>+</sup>, (B) 2<sup>+</sup>, (C) 3<sup>+</sup> and (D) 4<sup>+</sup>. CD3<sup>+</sup> T cell count was scored semi-quantitatively as follows: (E) 1<sup>+</sup>, (F) 2<sup>+</sup>, (G) 3<sup>+</sup> and (H) 4<sup>+</sup>.

**Supplementary Table 1: Disease-free survival**

| Clinicopathological variables                           |                        |         |
|---------------------------------------------------------|------------------------|---------|
| Parameter                                               | Univariate HR (95% CI) | P-value |
| Age                                                     |                        |         |
| < 50 years                                              | 1                      |         |
| 50 – 69 years                                           | 0.65 (0.23–1.83)       | 0.3338  |
| ≥ 70 years                                              | 0.32 (0.08–1.28)       | 0.1368  |
| T stage                                                 |                        |         |
| T1-2                                                    | 1                      |         |
| T3-4                                                    | 1.58 (0.75–3.32)       | 0.2062  |
| N stage                                                 |                        |         |
| N0                                                      | 1                      |         |
| N1                                                      | 0.43 (0.12–1.49)       | 0.2534  |
| N2-3                                                    | 1.10 (0.50–2.42)       | 0.8096  |
| Grade of differentiation                                |                        |         |
| Well / moderately                                       | 1                      |         |
| Poorly                                                  | 0.72 (0.30–1.73)       | 0.4939  |
| Basaloid                                                | 0.45 (0.15–1.30)       | 0.2576  |
| Primary treatment                                       |                        |         |
| Surgery                                                 | 1                      |         |
| Radiotherapy                                            | 0.65 (0.26–1.71)       | 0.4001  |
| Chemoradiotherapy                                       | 1.41 (0.60–3.55)       | 0.4036  |
| <b>Stromal immune cell infiltrate</b>                   |                        |         |
| Parameter                                               | Univariate HR (95% CI) | P-value |
| TIL count                                               |                        |         |
| Low                                                     | 1                      |         |
| High                                                    | 0.70 (0.32–1.50)       | 0.3548  |
| CD3 <sup>+</sup> T cell count                           |                        |         |
| Low                                                     | 1                      |         |
| High                                                    | 0.82 (0.37–1.81)       | 0.6107  |
| CD8 <sup>+</sup> T cell count                           |                        |         |
| Low                                                     | 1                      |         |
| High                                                    | 0.51 (0.23–1.38)       | 0.2050  |
| FoxP3 <sup>+</sup> T cell count                         |                        |         |
| Low                                                     | 1                      |         |
| High                                                    | 0.65 (0.29–1.51)       | 0.3280  |
| <b>Tumor</b>                                            |                        |         |
| Parameter                                               | Univariate HR (95% CI) | P-value |
| HPV status                                              |                        |         |
| Negative                                                | 1                      |         |
| Positive                                                | 0.39 (0.20–1.16)       | 0.1033  |
| SP142 PD-L1                                             |                        |         |
| Low                                                     | 1                      |         |
| High                                                    | 0.43 (0.22–1.16)       | 0.1070  |
| 22C3 PD-L1                                              |                        |         |
| Low                                                     | 1                      |         |
| High                                                    | 1.28 (0.60–2.83)       | 0.5110  |
| Combination SP142 PD-L1 / CD8 <sup>+</sup> T cell count |                        |         |
| PD-L1 <sup>-</sup> / low CD8 <sup>+</sup>               | 1                      |         |
| At least 1 high                                         | 0.44 (0.21–1.11)       | 0.0849  |
| Combination 22C3 PD-L1 / CD8 <sup>+</sup> T cell count  |                        |         |
| PD-L1 <sup>-</sup> / low CD8 <sup>+</sup>               | 1                      |         |
| At least 1 high                                         | 1.04 (0.46–2.36)       | 0.9167  |

Univariate HR was calculated via Kaplan-Meier survival analysis and log-rank test. Cut-off values were taken at median values (3<sup>+</sup>: abundant occurrence of TILs, CD3<sup>+</sup> T cells and CD8<sup>+</sup> T cells; and 2<sup>+</sup>: moderate numbers of FoxP3<sup>+</sup> T cells) and at ≥ 5% for PD-L1 on TCs (SP142 clone and 22C3 clone). Samples that were classified as ‘impossible to evaluate’ were not included in the survival analysis. HPV, human papillomavirus; HR, hazard ratio; TIL, tumor-infiltrating lymphocyte.
